# Supplementary material for: A gene expression map of host immune response in human brucellosis
Source: bioRxiv or medRxiv preprint supplement (doi:10.1101/2022.03.01.22271720), 2022-03-04
Supplement: Supplementary file [file media-1.pdf]

**Title: A gene expression map of host immune response in human brucellosis**

**SUPPLEMENTARY MATERIAL**

**Supplementary Table 1.** Diagnostic laboratory findings at relapse and remission of patients with chronic relapsing brucellosis (24 males/1 female, mean age 60.6±6.9 years).

| #Patient | Blood culture |     | Wright's SAT<br>(positive ≥1:160) |     | Coombs' antibrucella<br>SAT (positive ≥1:320) |       | Complement Fixation<br>test (positive ≥1:16) |     |
|----------|---------------|-----|-----------------------------------|-----|-----------------------------------------------|-------|----------------------------------------------|-----|
|          | Rel           | Rem | Rel                               | Rem | Rel                                           | Rem   | Rel                                          | Rem |
| CRB1     | pos           | neg | 160                               | 160 | 640                                           | 640   | 32                                           | 32  |
| CRB2     | neg           | neg | 320                               | 160 | >1280                                         | 640   | 32                                           | 16  |
| CRB3     | pos           | neg | 160                               | 80  | 640                                           | 320   | 64                                           | 16  |
| CRB4     | pos           | neg | 80                                | 80  | 320                                           | 320   | 64                                           | 32  |
| CRB5     | neg           | neg | 320                               | 320 | >1280                                         | >1280 | 256                                          | 64  |
| CRB6     | neg           | neg | 160                               | 160 | 640                                           | 640   | 128                                          | 64  |
| CRB7     | pos           | neg | 160                               | 160 | 1280                                          | 320   | 128                                          | 16  |
| CRB8     | neg           | neg | 320                               | 640 | >1280                                         | >1280 | 32                                           | 16  |
| CRB9     | pos           | neg | 160                               | 160 | 640                                           | 640   | 128                                          | 32  |
| CRB10    | neg           | neg | 160                               | 80  | 160                                           | 160   | 64                                           | 16  |
| CRB11    | neg           | neg | 80                                | 160 | 1280                                          | 640   | 128                                          | 32  |
| CRB12    | neg           | neg | 160                               | 80  | 320                                           | 320   | 16                                           | 32  |
| CRB13    | pos           | neg | 80                                | 40  | 320                                           | 160   | 256                                          | 32  |
| CRB14    | neg           | neg | 80                                | 160 | 320                                           | 640   | 128                                          | 64  |
| CRB15    | neg           | neg | 640                               | 160 | >1280                                         | 640   | 64                                           | 64  |
| CRB16    | neg           | neg | 320                               | 160 | 320                                           | 160   | 128                                          | 64  |
| CRB18    | neg           | neg | 320                               | 640 | >1280                                         | >1280 | 32                                           | 16  |
| CRB19    | pos           | neg | 160                               | 160 | 640                                           | 640   | 128                                          | 32  |
| CRB20    | neg           | neg | 160                               | 80  | 160                                           | 160   | 64                                           | 16  |
| CRB21    | neg           | neg | 80                                | 160 | 1280                                          | 640   | 128                                          | 32  |
| CRB22    | neg           | neg | 160                               | 80  | 320                                           | 320   | 16                                           | 32  |
| CRB23    | neg           | neg | 80                                | 160 | 320                                           | 640   | 128                                          | 64  |
| CRB24    | neg           | neg | 640                               | 160 | >1280                                         | 640   | 64                                           | 64  |
| CRB25    | pos           | neg | 640                               | 320 | 1280                                          | >1280 | >256                                         | 32  |

CRB; chronic relapsing brucellosis, rel; relapse, rem; remission, pos; positive, neg; negative SAT; serum agglutination test. Results of serological tests are expressed as reciprocal titers.
